# Supplementary material for: Flux synthesis, crystal structures, and physical properties of new lanthanum vanadium oxyselenides
Source: Royal Society of Chemistry journal article supplement (doi:10.1039/c7dt00779e), 2017-01-01
Supplement: c7dt00779e1.pdf [file c7dt00779e1.pdf]

Electronic Supplementary Information (ESI)

# Flux Synthesis, Crystal Structures, and Physical Properties of New Lanthanum Vanadium Oxyselenides

Simon Peschke,<sup>a</sup> Lisa Gamperl,<sup>a</sup> Valentin Weippert,<sup>a</sup>  
and Dirk Johrendt<sup>\*a</sup>

<sup>a</sup> *Department Chemie, Ludwig-Maximilians-Universität München, D-81377 München,  
Germany. Fax: +49 (0)89 2180 77431; Tel: +49 (0)89 2180 77430;  
E-mail: dirk.johrendt@cup.uni-muenchen.de*

**Table S1** Crystallographic data of LaVSe<sub>2</sub>O.

|                                                                               |                                              |                                      |            |            |            |            |
|-------------------------------------------------------------------------------|----------------------------------------------|--------------------------------------|------------|------------|------------|------------|
| Formula weight/g mol <sup>-1</sup>                                            | 363.8                                        |                                      |            |            |            |            |
| Space group, <i>Z</i>                                                         | <i>C2/m</i> , 4                              |                                      |            |            |            |            |
| <i>a</i> , <i>b</i> , <i>c</i> /pm                                            | 1171.1(1), 388.6(1), 843.6(1)                |                                      |            |            |            |            |
| $\beta/^\circ$                                                                | 90.19(1)                                     |                                      |            |            |            |            |
| $V/\text{\AA}^3$ , $\rho_{\text{X-ray}}/\text{g cm}^{-3}$                     | 383.9(1), 6.29                               |                                      |            |            |            |            |
| Crystal size/mm <sup>3</sup>                                                  | 0.04 × 0.02 × 0.02                           |                                      |            |            |            |            |
| Diffractometer                                                                | Bruker D8 QUEST                              |                                      |            |            |            |            |
| Radiation $\lambda$ /pm                                                       | 71.073                                       |                                      |            |            |            |            |
| Absorption coeff. $\mu/\text{mm}^{-1}$                                        | 32.1                                         |                                      |            |            |            |            |
| $2\theta$ range/ $^\circ$                                                     | 4.82–70.14                                   |                                      |            |            |            |            |
| Index range ( <i>hkl</i> )                                                    | $h \pm 18$ , $-5 \leq k \leq 6$ , $l \pm 13$ |                                      |            |            |            |            |
| No. reflections collected                                                     | 5307                                         |                                      |            |            |            |            |
| No. unique data, $R_{\text{int}}$ , $R_{\sigma}$                              | 943, 0.03, 0.02                              |                                      |            |            |            |            |
| No. data with $I > 3\sigma(I)$                                                | 866                                          |                                      |            |            |            |            |
| No. parameters                                                                | 34                                           |                                      |            |            |            |            |
| $R_1(\text{obs/all})$                                                         | 0.018/0.020                                  |                                      |            |            |            |            |
| $wR_2(\text{obs/all})$                                                        | 0.046/0.054                                  |                                      |            |            |            |            |
| $\Delta\rho_{\text{max}}$ , $\Delta\rho_{\text{min}}/\text{e}\text{\AA}^{-3}$ | 1.86/−2.38                                   |                                      |            |            |            |            |
| Atomic and displacement parameters                                            |                                              |                                      |            |            |            |            |
|                                                                               | Site                                         | <i>x</i> , <i>y</i> , <i>z</i>       | $U_{11}$   | $U_{22}$   | $U_{33}$   | $U_{13}$   |
| La1                                                                           | 4 <i>i</i>                                   | 0.2303(2), 0, 0.1979(1)              | 0.0058(1)  | 0.0050(1)  | 0.0047(1)  | 0.0009(1)  |
| Se1                                                                           | 4 <i>i</i>                                   | 0.9531(1), 0, 0.1994(1)              | 0.0063(2)  | 0.0065(2)  | 0.0043(2)  | 0.0001(1)  |
| Se2                                                                           | 4 <i>i</i>                                   | 0.1407(1), $\frac{1}{2}$ , 0.4648(1) | 0.0061(2)  | 0.0067(2)  | 0.0060(2)  | 0.0008(1)  |
| V1                                                                            | 2 <i>b</i>                                   | 0, $\frac{1}{2}$ , 0                 | 0.0037(4)  | 0.0069(4)  | 0.0050(4)  | −0.0002(3) |
| V2                                                                            | 2 <i>c</i>                                   | 0, 0, $\frac{1}{2}$                  | 0.0059(4)  | 0.0082(4)  | 0.0052(4)  | 0.0009(3)  |
| O1                                                                            | 4 <i>i</i>                                   | 0.1629(1), $\frac{1}{2}$ , 0.0582(1) | 0.0052(11) | 0.0082(12) | 0.0052(11) | 0.0006(9)  |

**Table S2** Crystallographic data of  $\text{La}_5\text{V}_3\text{Se}_6\text{O}_7$ .

|                                                                               |                                                        |                                           |            |           |           |             |
|-------------------------------------------------------------------------------|--------------------------------------------------------|-------------------------------------------|------------|-----------|-----------|-------------|
| Formula weight/g mol <sup>-1</sup>                                            | 1433.1                                                 |                                           |            |           |           |             |
| Space group, $Z$                                                              | $Pm\bar{m}n$ , 2                                       |                                           |            |           |           |             |
| $a$ , $b$ , $c$ /pm                                                           | 1817.4(1), 391.1(1), 1046.7(1)                         |                                           |            |           |           |             |
| $V/\text{\AA}^3$ , $\rho_{\text{X-ray}}/\text{g cm}^{-3}$                     | 774.0(3), 6.40                                         |                                           |            |           |           |             |
| Crystal size/mm <sup>3</sup>                                                  | $0.05 \times 0.01 \times 0.005$                        |                                           |            |           |           |             |
| Diffractometer                                                                | Bruker D8 QUEST                                        |                                           |            |           |           |             |
| Radiation $\lambda$ /pm                                                       | 71.073                                                 |                                           |            |           |           |             |
| Absorption coeff. $\mu/\text{mm}^{-1}$                                        | 30.5                                                   |                                           |            |           |           |             |
| $2\theta$ range/ $^\circ$                                                     | 5.94–70.00                                             |                                           |            |           |           |             |
| Index range ( $hkl$ )                                                         | $-28 \leq h \leq 29$ , $-6 \leq k \leq 5$ , $l \pm 16$ |                                           |            |           |           |             |
| No. reflections collected                                                     | 20542                                                  |                                           |            |           |           |             |
| No. unique data, $R_{\text{int}}$ , $R_\sigma$                                | 1514, 0.06, 0.04                                       |                                           |            |           |           |             |
| No. data with $I > 3\sigma(I)$                                                | 1233                                                   |                                           |            |           |           |             |
| No. parameters                                                                | 69                                                     |                                           |            |           |           |             |
| $R_1(\text{obs/all})$                                                         | 0.023/0.036                                            |                                           |            |           |           |             |
| $wR_2(\text{obs/all})$                                                        | 0.047/0.050                                            |                                           |            |           |           |             |
| $\Delta\rho_{\text{max}}$ , $\Delta\rho_{\text{min}}/\text{e}\text{\AA}^{-3}$ | 2.44/−2.96                                             |                                           |            |           |           |             |
| Atomic and displacement parameters                                            |                                                        |                                           |            |           |           |             |
|                                                                               | Site                                                   | $x$ , $y$ , $z$                           | $U_{11}$   | $U_{22}$  | $U_{33}$  | $U_{13}$    |
| La1                                                                           | 4f                                                     | 0.3851(2), $\frac{1}{2}$ , 0.0207(1)      | 0.0063(2)  | 0.0039(2) | 0.0078(2) | 0.0006(1)   |
| La2                                                                           | 2b                                                     | $\frac{1}{2}$ , 0, 0.7740(1)              | 0.0052(2)  | 0.0041(2) | 0.0063(2) | 0           |
| La3                                                                           | 4f                                                     | 0.1654(2), $\frac{1}{2}$ , 0.5898(1)      | 0.0073(2)  | 0.0054(2) | 0.0067(2) | −0.0015(1)  |
| Se1                                                                           | 2b                                                     | $\frac{1}{2}$ , 0, 0.1386(1)              | 0.0078(4)  | 0.0058(4) | 0.0051(4) | 0           |
| Se2                                                                           | 2b                                                     | 0, $\frac{1}{2}$ , 0.5341(1)              | 0.0070(4)  | 0.0063(4) | 0.0049(4) | 0           |
| Se3                                                                           | 4f                                                     | 0.1179(1), 0, 0.3578(1)                   | 0.0066(3)  | 0.0052(3) | 0.0058(3) | −0.0005(2)  |
| Se4                                                                           | 4f                                                     | 0.2345(3), $\frac{1}{2}$ , 0.8571(1)      | 0.0065(3)  | 0.0062(3) | 0.0056(3) | 0.0004(2)   |
| V1                                                                            | 2a                                                     | 0, 0, 0.6896(1)                           | 0.0051(6)  | 0.0083(7) | 0.0075(7) | 0           |
| V2                                                                            | 4f                                                     | 0.3065(1), 0, 0.7500(1)                   | 0.0060(5)  | 0.0075(5) | 0.0046(4) | −0.0014(4)  |
| O1                                                                            | 4f                                                     | 0.2480(1), 0, 0.6042(1)                   | 0.0054(19) | 0.007(2)  | 0.011(2)  | 0.0019(16)  |
| O2                                                                            | 2a                                                     | $\frac{1}{2}$ , $\frac{1}{2}$ , 0.9003(1) | 0.008(3)   | 0.008(3)  | 0.003(3)  | 0           |
| O3                                                                            | 4f                                                     | 0.3782(1), 0, 0.8847(1)                   | 0.0087(19) | 0.006(2)  | 0.008(2)  | 0.0016(16)  |
| O4                                                                            | 4f                                                     | 0.0993(1), 0, 0.7090(1)                   | 0.007(2)   | 0.010(2)  | 0.013(2)  | −0.0003(17) |

**Table S3** Crystallographic data of  $\text{La}_5\text{V}_3\text{Se}_7\text{O}_5$ .

|                                                                            |                                        |                                     |            |            |            |             |  |
|----------------------------------------------------------------------------|----------------------------------------|-------------------------------------|------------|------------|------------|-------------|--|
| Formula weight/g mol <sup>-1</sup>                                         | 1480.1                                 |                                     |            |            |            |             |  |
| Space group, $Z$                                                           | $Pnma$ , 4                             |                                     |            |            |            |             |  |
| $a, b, c$ /pm                                                              | 1650.4(1), 390.1(1), 2475.7(1)         |                                     |            |            |            |             |  |
| $V/\text{\AA}^3, \rho_{\text{X-ray}}/\text{g cm}^{-3}$                     | 1594.0(3), 6.17                        |                                     |            |            |            |             |  |
| Crystal size/mm <sup>3</sup>                                               | $0.07 \times 0.01 \times 0.01$         |                                     |            |            |            |             |  |
| Diffractometer                                                             | Bruker D8 QUEST                        |                                     |            |            |            |             |  |
| Radiation $\lambda$ /pm                                                    | 71.073                                 |                                     |            |            |            |             |  |
| Absorption coeff. $\mu/\text{mm}^{-1}$                                     | 30.7                                   |                                     |            |            |            |             |  |
| $2\theta$ range/ $^\circ$                                                  | 4.94–70.16                             |                                     |            |            |            |             |  |
| Index range ( $hkl$ )                                                      | $h \pm 26, -6 \leq k \leq 5, l \pm 39$ |                                     |            |            |            |             |  |
| No. reflections collected                                                  | 41381                                  |                                     |            |            |            |             |  |
| No. unique data, $R_{\text{int}}, R_{\sigma}$                              | 3959, 0.06, 0.04                       |                                     |            |            |            |             |  |
| No. data with $I > 3\sigma(I)$                                             | 2958                                   |                                     |            |            |            |             |  |
| No. parameters                                                             | 121                                    |                                     |            |            |            |             |  |
| $R_1(\text{obs/all})$                                                      | 0.024/0.045                            |                                     |            |            |            |             |  |
| $wR_2(\text{obs/all})$                                                     | 0.042/0.047                            |                                     |            |            |            |             |  |
| $\Delta\rho_{\text{max}}, \Delta\rho_{\text{min}}/\text{e}\text{\AA}^{-3}$ | 2.88/–2.84                             |                                     |            |            |            |             |  |
| Atomic and displacement parameters                                         |                                        |                                     |            |            |            |             |  |
|                                                                            | Site                                   | $x, y, z$                           | $U_{11}$   | $U_{22}$   | $U_{33}$   | $U_{13}$    |  |
| La1                                                                        | 4c                                     | 0.0340(2), $\frac{3}{4}, 0.0880(1)$ | 0.0073(1)  | 0.0045(1)  | 0.0058(1)  | 0.0004(1)   |  |
| La2                                                                        | 4c                                     | 0.1802(2), $\frac{1}{4}, 0.1778(1)$ | 0.0083(1)  | 0.0046(1)  | 0.0061(1)  | –0.0001(1)  |  |
| La3                                                                        | 4c                                     | 0.0021(2), $\frac{3}{4}, 0.2474(1)$ | 0.0094(1)  | 0.0042(1)  | 0.0054(1)  | 0.0000(1)   |  |
| La4                                                                        | 4c                                     | 0.1993(2), $\frac{1}{4}, 0.8867(1)$ | 0.0064(1)  | 0.0045(1)  | 0.0060(1)  | –0.0006(1)  |  |
| La5                                                                        | 4c                                     | 0.3621(2), $\frac{3}{4}, 0.9650(1)$ | 0.0071(1)  | 0.0043(1)  | 0.0063(1)  | –0.0009(1)  |  |
| Se1                                                                        | 4c                                     | 0.5711(1), $\frac{3}{4}, 0.1329(2)$ | 0.0066(2)  | 0.0061(2)  | 0.0069(2)  | –0.0001(2)  |  |
| Se2                                                                        | 4c                                     | 0.8887(1), $\frac{1}{4}, 0.0243(2)$ | 0.0092(2)  | 0.0092(3)  | 0.0062(2)  | 0.0006(2)   |  |
| Se3                                                                        | 4c                                     | 0.4481(1), $\frac{1}{4}, 0.0467(2)$ | 0.0079(2)  | 0.0067(2)  | 0.0069(2)  | –0.0008(2)  |  |
| Se4                                                                        | 4c                                     | 0.2663(1), $\frac{3}{4}, 0.0816(1)$ | 0.0065(2)  | 0.0061(2)  | 0.0083(2)  | –0.0009(2)  |  |
| Se5                                                                        | 4c                                     | 0.2610(1), $\frac{1}{4}, 0.7730(2)$ | 0.0097(2)  | 0.0067(2)  | 0.0062(2)  | 0.0007(2)   |  |
| Se6                                                                        | 4c                                     | 0.9302(1), $\frac{1}{4}, 0.1620(2)$ | 0.0079(2)  | 0.0063(2)  | 0.0068(2)  | –0.0015(2)  |  |
| Se7                                                                        | 4c                                     | 0.3844(1), $\frac{1}{4}, 0.1810(2)$ | 0.0099(2)  | 0.0074(2)  | 0.0076(2)  | –0.0005(2)  |  |
| V1                                                                         | 4c                                     | 0.1964(1), $\frac{1}{4}, 0.0297(1)$ | 0.0064(4)  | 0.0082(4)  | 0.0059(3)  | 0.0019(3)   |  |
| V2                                                                         | 4c                                     | 0.1529(1), $\frac{1}{4}, 0.3183(1)$ | 0.0074(4)  | 0.0076(4)  | 0.0047(3)  | –0.0016(3)  |  |
| V3                                                                         | 4c                                     | 0.4160(1), $\frac{3}{4}, 0.1136(1)$ | 0.0070(4)  | 0.0091(4)  | 0.0076(3)  | –0.0010(3)  |  |
| O1                                                                         | 4c                                     | 0.2779(1), $\frac{3}{4}, 0.8830(1)$ | 0.0031(15) | 0.0065(16) | 0.0050(14) | 0.0007(12)  |  |
| O2                                                                         | 4c                                     | 0.0821(1), $\frac{1}{4}, 0.2567(1)$ | 0.0046(16) | 0.0078(17) | 0.0073(15) | –0.0008(12) |  |
| O3                                                                         | 4c                                     | 0.1119(1), $\frac{1}{4}, 0.0843(1)$ | 0.0052(16) | 0.0063(17) | 0.0044(14) | 0.0024(12)  |  |
| O4                                                                         | 4c                                     | 0.1012(1), $\frac{3}{4}, 0.1712(1)$ | 0.0070(17) | 0.0042(16) | 0.0070(15) | 0.0002(12)  |  |
| O5                                                                         | 4c                                     | 0.2753(1), $\frac{1}{4}, 0.9712(1)$ | 0.0068(17) | 0.0056(17) | 0.0054(15) | 0.0002(12)  |  |

**Table S4** Crystallographic data of  $\text{La}_7\text{VSe}_5\text{O}_7$ .

|                                                                            |                                  |                                        |            |                  |            |             |
|----------------------------------------------------------------------------|----------------------------------|----------------------------------------|------------|------------------|------------|-------------|
| Formula weight/g mol <sup>-1</sup>                                         | 1530.1                           |                                        |            |                  |            |             |
| Space group, $Z$                                                           | $Cmcm$ , 4                       |                                        |            |                  |            |             |
| $a, b, c/\text{pm}$                                                        | 398.6(1), 1286.3(1), 3229.0(1)   |                                        |            |                  |            |             |
| $V/\text{\AA}^3, \rho_{\text{X-ray}}/\text{g cm}^{-3}$                     | 1655.5(1), 6.14                  |                                        |            |                  |            |             |
| Crystal size/ $\text{mm}^3$                                                | $0.04 \times 0.005 \times 0.005$ |                                        |            |                  |            |             |
| Diffractometer                                                             | Bruker D8 Venture                |                                        |            |                  |            |             |
| Radiation $\lambda/\text{pm}$                                              | 71.073                           |                                        |            |                  |            |             |
| Absorption coeff. $\mu/\text{mm}^{-1}$                                     | 29.2                             |                                        |            |                  |            |             |
| $2\theta$ range/ $^\circ$                                                  | 6.47–49.99                       |                                        |            |                  |            |             |
| Index range ( $hkl$ )                                                      | $h \pm 4, k \pm 14, l \pm 38$    |                                        |            |                  |            |             |
| No. reflections collected                                                  | 6698                             |                                        |            |                  |            |             |
| No. unique data, $R_{\text{int}}, R_{\sigma}$                              | 854, 0.05, 0.03                  |                                        |            |                  |            |             |
| No. data with $I > 2\sigma(I)$                                             | 769                              |                                        |            |                  |            |             |
| No. parameters                                                             | 54                               |                                        |            |                  |            |             |
| $R_1(\text{obs/all})$                                                      | 0.032/0.037                      |                                        |            |                  |            |             |
| $wR_2(\text{obs/all})$                                                     | 0.074/0.079                      |                                        |            |                  |            |             |
| $\Delta\rho_{\text{max}}, \Delta\rho_{\text{min}}/\text{e}\text{\AA}^{-3}$ | 1.77/−1.97                       |                                        |            |                  |            |             |
| Atomic and displacement parameters                                         |                                  |                                        |            |                  |            |             |
|                                                                            | Site                             | $x, y, z$                              | $U_{11}$   | $U_{22}$         | $U_{33}$   | $U_{23}$    |
| La1                                                                        | $4c$                             | $0, 0.0580(1), \frac{1}{4}$            | 0.0075(6)  | 0.0092(6)        | 0.0046(6)  | 0           |
| La2                                                                        | $8f$                             | $\frac{1}{2}, 0.8655(1), 0.3131(1)$    | 0.0084(5)  | 0.0101(5)        | 0.0033(4)  | 0.0001(3)   |
| La3                                                                        | $8f$                             | $0, 0.0359(1), 0.3862(1)$              | 0.0083(5)  | 0.0097(5)        | 0.0048(4)  | 0.0001(3)   |
| La4                                                                        | $8f$                             | $\frac{1}{2}, 0.8205(1), 0.4372(1)$    | 0.0087(5)  | 0.0103(5)        | 0.0045(4)  | 0.0006(3)   |
| Se1                                                                        | $8f$                             | $0, 0.7241(1), 0.3680(1),$             | 0.0118(8)  | 0.0111(8)        | 0.0081(7)  | 0.0016(6)   |
| Se2                                                                        | $4c$                             | $\frac{1}{2}, 0.2468(2), \frac{1}{4}$  | 0.0112(11) | 0.0110(11)       | 0.0072(10) | 0           |
| Se3                                                                        | $8f$                             | $\frac{1}{2}, 0.8787(1), 0.5302(1)$    | 0.0138(8)  | 0.0128(8)        | 0.0044(7)  | 0.0004(6)   |
| V1                                                                         | $4a$                             | $0, 0, \frac{1}{2}$                    | 0.0103(19) | 0.0139(19)       | 0.0020(16) | −0.0036(14) |
|                                                                            |                                  |                                        |            | $U_{\text{iso}}$ |            |             |
| O1                                                                         | $4c$                             | $\frac{1}{2}, 0.9654(10), \frac{1}{4}$ |            | 0.003(3)         |            |             |
| O2                                                                         | $8f$                             | $0, 0.0824(8), 0.5511(3)$              |            | 0.006(2)         |            |             |
| O3                                                                         | $8f$                             | $\frac{1}{2}, 0.9394(8), 0.3823(3)$    |            | 0.008(2)         |            |             |
| O4                                                                         | $8f$                             | $0, 0.9763(8), 0.3172(3)$              |            | 0.009(2)         |            |             |

**Table S5** Crystallographic data of  $\text{La}_{13}\text{V}_7\text{Se}_{16}\text{O}_{15}$ .

|                                                                               |                                                        |                                      |           |           |           |            |  |
|-------------------------------------------------------------------------------|--------------------------------------------------------|--------------------------------------|-----------|-----------|-----------|------------|--|
| Formula weight/g mol <sup>-1</sup>                                            | 3665.7                                                 |                                      |           |           |           |            |  |
| Space group, $Z$                                                              | $Cmc2_1$ , 4                                           |                                      |           |           |           |            |  |
| $a$ , $b$ , $c$ /pm                                                           | 393.8(1), 5400.9(1), 1834.9(1)                         |                                      |           |           |           |            |  |
| $V/\text{\AA}^3$ , $\rho_{\text{X-ray}}/\text{g cm}^{-3}$                     | 3902.9(1), 6.24                                        |                                      |           |           |           |            |  |
| Crystal size/mm <sup>3</sup>                                                  | $0.03 \times 0.02 \times 0.005$                        |                                      |           |           |           |            |  |
| Diffractometer                                                                | Bruker D8 QUEST                                        |                                      |           |           |           |            |  |
| Radiation $\lambda$ /pm                                                       | 71.073                                                 |                                      |           |           |           |            |  |
| Absorption coeff. $\mu/\text{mm}^{-1}$                                        | 30.4                                                   |                                      |           |           |           |            |  |
| $2\theta$ range/ $^\circ$                                                     | 4.68–70.02                                             |                                      |           |           |           |            |  |
| Index range ( $hkl$ )                                                         | $-5 \leq h \leq 6$ , $-83 \leq k \leq 86$ , $l \pm 29$ |                                      |           |           |           |            |  |
| No. reflections collected                                                     | 73357                                                  |                                      |           |           |           |            |  |
| No. unique data, $R_{\text{int}}$ , $R_\sigma$                                | 6370, 0.05, 0.04                                       |                                      |           |           |           |            |  |
| No. data with $I > 2\sigma(I)$                                                | 5694                                                   |                                      |           |           |           |            |  |
| No. parameters                                                                | 263                                                    |                                      |           |           |           |            |  |
| $R_1(\text{obs/all})$                                                         | 0.017/0.023                                            |                                      |           |           |           |            |  |
| $wR_2(\text{obs/all})$                                                        | 0.036/0.038                                            |                                      |           |           |           |            |  |
| $\Delta\rho_{\text{max}}$ , $\Delta\rho_{\text{min}}/\text{e}\text{\AA}^{-3}$ | 0.81/–1.12                                             |                                      |           |           |           |            |  |
| Atomic and displacement parameters                                            |                                                        |                                      |           |           |           |            |  |
|                                                                               | Site                                                   | $x$ , $y$ , $z$                      | $U_{11}$  | $U_{22}$  | $U_{33}$  | $U_{23}$   |  |
| La1                                                                           | 4a                                                     | 0, 0.1582(1), 0.0370(1)              | 0.0039(3) | 0.0079(3) | 0.0061(3) | 0.0010(3)  |  |
| La2                                                                           | 4a                                                     | 0, 0.1586(1), 0.2709(1)              | 0.0045(3) | 0.0075(3) | 0.0063(3) | –0.0020(2) |  |
| La3                                                                           | 4a                                                     | 0, 0.3509(1), 0.2632(1)              | 0.0053(3) | 0.0066(3) | 0.0067(3) | –0.0004(2) |  |
| La4                                                                           | 4a                                                     | $\frac{1}{2}$ , 0.1139(1), 0.1546(1) | 0.0043(1) | 0.0058(2) | 0.0045(1) | 0.0000(3)  |  |
| La5                                                                           | 4a                                                     | $\frac{1}{2}$ , 0.0399(1), 0.2835(1) | 0.0047(3) | 0.0056(3) | 0.0068(3) | –0.0001(2) |  |
| La6                                                                           | 4a                                                     | 0, 0.4724(1), 0.1566(1)              | 0.0056(1) | 0.0070(2) | 0.0090(2) | –0.0008(3) |  |
| La7                                                                           | 4a                                                     | 0, 0.0630(1), 0.4493(1)              | 0.0044(3) | 0.0076(3) | 0.0063(3) | –0.0010(2) |  |
| La8                                                                           | 4a                                                     | 0, 0.2670(1), 0.8183(1)              | 0.0066(3) | 0.0066(3) | 0.0079(3) | –0.0019(2) |  |
| La9                                                                           | 4a                                                     | $\frac{1}{2}$ , 0.2319(1), 0.9875(1) | 0.0062(3) | 0.0072(3) | 0.0078(3) | –0.0015(2) |  |
| La10                                                                          | 4a                                                     | 0, 0.9367(1), 0.3567(1)              | 0.0047(3) | 0.0066(3) | 0.0094(3) | –0.0023(2) |  |
| La11                                                                          | 4a                                                     | $\frac{1}{2}$ , 0.9597(1), 0.5251(1) | 0.0047(3) | 0.0055(3) | 0.0063(3) | –0.0006(2) |  |
| La12                                                                          | 4a                                                     | $\frac{1}{2}$ , 0.3021(1), 0.1531(1) | 0.0041(1) | 0.0058(2) | 0.0058(1) | –0.0003(3) |  |
| La13                                                                          | 4a                                                     | 0, 0.3493(1), 0.0396(1)              | 0.0046(3) | 0.0084(3) | 0.0061(3) | 0.0006(2)  |  |
| Se1                                                                           | 4a                                                     | $\frac{1}{2}$ , 0.0163(1), 0.4899(1) | 0.0083(6) | 0.0065(5) | 0.0061(5) | –0.0001(4) |  |
| Se2                                                                           | 4a                                                     | 0, 0.1210(1), 0.4226(1)              | 0.0077(6) | 0.0067(5) | 0.0092(5) | –0.0018(4) |  |
| Se3                                                                           | 4a                                                     | $\frac{1}{2}$ , 0.1811(1), 0.3890(1) | 0.0066(6) | 0.0066(5) | 0.0060(5) | –0.0008(4) |  |
| Se4                                                                           | 4a                                                     | 0, 0.3199(1), 0.4161(1)              | 0.0065(6) | 0.0063(5) | 0.0066(5) | –0.0010(4) |  |
| Se5                                                                           | 4a                                                     | 0, 0.2767(1), 0.0338(1)              | 0.0059(6) | 0.0066(5) | 0.0057(5) | 0.0011(4)  |  |
| Se6                                                                           | 4a                                                     | $\frac{1}{2}$ , 0.2433(1), 0.1524(1) | 0.0070(2) | 0.0054(3) | 0.0070(3) | 0.0011(5)  |  |
| Se7                                                                           | 4a                                                     | $\frac{1}{2}$ , 0.1808(1), 0.1539(1) | 0.0050(2) | 0.0059(3) | 0.0082(3) | 0.0002(6)  |  |
| Se8                                                                           | 4a                                                     | 0, 0.0843(2), 0.0537(1)              | 0.0063(6) | 0.0063(5) | 0.0082(5) | –0.0025(4) |  |
| Se9                                                                           | 4a                                                     | 0, 0.0199(1), 0.1550(1)              | 0.0082(3) | 0.0093(3) | 0.0088(3) | 0.0003(6)  |  |
| Se10                                                                          | 4a                                                     | 0, 0.2775(1), 0.2717(1)              | 0.0062(6) | 0.0056(5) | 0.0073(5) | 0.0012(4)  |  |
| Continued on next page                                                        |                                                        |                                      |           |           |           |            |  |

---

Atomic and displacement parameters

|      | Site | $x, y, z$                           | $U_{11}$  | $U_{22}$         | $U_{33}$  | $U_{23}$   |
|------|------|-------------------------------------|-----------|------------------|-----------|------------|
| Se11 | 4a   | $\frac{1}{2}, 0.3719(1), 0.1484(1)$ | 0.0070(3) | 0.0050(3)        | 0.0096(4) | -0.0008(4) |
| Se12 | 4a   | 0, 0.0844(2), 0.2571(1)             | 0.0065(6) | 0.0069(5)        | 0.0078(5) | 0.0009(4)  |
| Se13 | 4a   | 0, 0.8784(1), 0.3896(1)             | 0.0061(6) | 0.0089(6)        | 0.0072(5) | -0.0007(4) |
| Se14 | 4a   | 0, 0.4114(2), 0.2525(1)             | 0.0059(4) | 0.0111(4)        | 0.0070(4) | -0.0025(3) |
| Se15 | 4a   | 0, 0.4215(2), 0.0700(1)             | 0.0072(4) | 0.0140(4)        | 0.0069(4) | 0.0030(3)  |
| Se16 | 4a   | $\frac{1}{2}, 0.9833(1), 0.3216(1)$ | 0.0073(6) | 0.0056(5)        | 0.0074(5) | -0.0005(4) |
| V1   | 4a   | $\frac{1}{2}, 0.2989(1), 0.3459(1)$ | 0.0089(1) | 0.0055(8)        | 0.0042(8) | 0.0019(6)  |
| V2   | 4a   | $\frac{1}{2}, 0.2975(1), 0.9600(1)$ | 0.0067(1) | 0.0040(8)        | 0.0075(9) | -0.0006(7) |
| V3   | 4a   | 0, 0.2133(2), 0.1537(1)             | 0.0079(4) | 0.0063(5)        | 0.0044(4) | 0.0008(9)  |
| V4   | 4a   | $\frac{1}{2}, 0.1048(1), 0.3429(1)$ | 0.0070(1) | 0.0053(9)        | 0.0060(9) | 0.0017(7)  |
| V5   | 4a   | 0, 0.9997(1), 0.4048(1)             | 0.0080(4) | 0.0047(4)        | 0.0068(4) | 0.0018(3)  |
| V6   | 4a   | $\frac{1}{2}, 0.8954(1), 0.4664(1)$ | 0.0111(1) | 0.0037(9)        | 0.0063(9) | 0.0003(7)  |
| V7   | 4a   | $\frac{1}{2}, 0.4181(1), 0.1623(1)$ | 0.0064(5) | 0.0051(5)        | 0.0101(8) | -0.0004(6) |
|      |      |                                     |           | $U_{\text{iso}}$ |           |            |
| O1   | 4a   | $\frac{1}{2}, 0.1323(1), 0.2769(1)$ |           | 0.0072(2)        |           |            |
| O2   | 4a   | $\frac{1}{2}, 0.3248(1), 0.2746(1)$ |           | 0.0078(2)        |           |            |
| O3   | 4a   | 0, 0.9687(15), 0.4553(1)            |           | 0.0102(2)        |           |            |
| O4   | 4a   | $\frac{1}{2}, 0.0708(1), 0.3831(1)$ |           | 0.0055(2)        |           |            |
| O5   | 4a   | $\frac{1}{2}, 0.9287(1), 0.4250(1)$ |           | 0.0059(2)        |           |            |
| O6   | 4a   | 0, 0.0314(1), 0.3527(1)             |           | 0.0042(2)        |           |            |
| O7   | 4a   | 0, 0.1373(1), 0.1548(1)             |           | 0.0065(1)        |           |            |
| O8   | 4a   | 0, 0.3257(1), 0.1501(1)             |           | 0.0056(1)        |           |            |
| O9   | 4a   | $\frac{1}{2}, 0.2700(1), 0.8992(1)$ |           | 0.0059(2)        |           |            |
| O10  | 4a   | 0, 0.2097(1), 0.0535(1)             |           | 0.0089(2)        |           |            |
| O11  | 4a   | $\frac{1}{2}, 0.3232(1), 0.0308(1)$ |           | 0.0076(2)        |           |            |
| O12  | 4a   | $\frac{1}{2}, 0.8674(1), 0.5328(1)$ |           | 0.0055(1)        |           |            |
| O13  | 4a   | $\frac{1}{2}, 0.4534(1), 0.1832(1)$ |           | 0.0143(2)        |           |            |
| O14  | 4a   | $\frac{1}{2}, 0.2708(1), 0.4037(1)$ |           | 0.0095(2)        |           |            |
| O15  | 4a   | 0 0.2096(1), 0.2506(1)              |           | 0.0088(2)        |           |            |

---

Note: Values of unlisted  $U_{xy}$  are equal zero.

**Table S6:** Calculations of the bond valence sum of vanadium by the bond valence method.

|               | V(n) | element | number of neighbours | distance /Å |        | valence sum |
|---------------|------|---------|----------------------|-------------|--------|-------------|
| LaVSe2O       | V(1) | Se      | 4                    | 2,6294      | 1,7809 | 3,02        |
|               |      | O       | 2                    | 1,9684      | 1,2349 |             |
|               | V(2) | Se      | 6                    | 2,5744      | 3,0994 | 3,10        |
| La5V3Se6O7    | V(2) | Se      | 4                    | 2,6248      | 1,8034 | 3,34        |
|               |      | O       | 2                    | 1,8885      | 1,5328 |             |
|               | V(1) | Se      | 4                    | 2,6006      | 1,9253 | 3,79        |
|               |      | O       | 2                    | 1,8161      | 1,8638 |             |
| La5V3Se7O5    | V(1) | Se      | 4                    | 2,6777      | 1,5631 | 2,88        |
|               |      | O       | 2                    | 1,9451      | 1,3153 |             |
|               | V(2) | Se      | 4                    | 2,6620      | 1,6307 | 2,95        |
|               |      | O       | 2                    | 1,9445      | 1,3173 |             |
|               | V(3) | Se      | 6                    | 2,6108      | 2,8090 | 2,81        |
|               |      |         |                      |             |        |             |
| La7VSe5O7     | V(1) | Se      | 4                    | 2,7123      | 1,4234 | 2,69        |
|               |      | O       | 2                    | 1,9584      | 1,2687 |             |
| La13V7Se16O15 | V(1) | Se      | 4                    | 2,6348      | 1,7551 | 3,35        |
|               |      | O       | 2                    | 1,8729      | 1,5985 |             |
|               | V(2) | Se      | 4                    | 2,6353      | 1,7527 | 3,28        |
|               |      | O       | 2                    | 1,8891      | 1,5301 |             |
|               | V(3) | Se      | 4                    | 2,5952      | 1,9533 | 3,80        |
|               |      |         |                      |             |        |             |



|      |    |   |        |        |      |
|------|----|---|--------|--------|------|
|      | O  | 2 | 1,8187 | 1,8507 |      |
| V(4) | Se | 4 | 2,6779 | 1,5621 | 2,83 |
|      | O  | 2 | 1,9573 | 1,2725 |      |
| V(5) | Se | 4 | 2,6553 | 1,6605 | 3,01 |
|      | O  | 2 | 1,9352 | 1,3508 |      |
| V(6) | Se | 4 | 2,6777 | 1,5629 | 2,88 |
|      | O  | 2 | 1,9445 | 1,3173 |      |
| V(7) | Se | 4 | 2,5822 | 2,0232 | 3,36 |
|      | O  | 2 | 1,9404 | 1,3320 |      |
